# Supplementary material for: Urine Hydrogen Peroxide Levels and Their Relation to Outcome in Patients with Sepsis, Septic Shock, and Major Burn Injury
Source: MDPI journal article supplement (doi:10.3390/biomedicines10040848), 2022-04-05
Supplement: s1 [file s1]

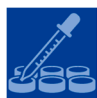

Supplementary materials

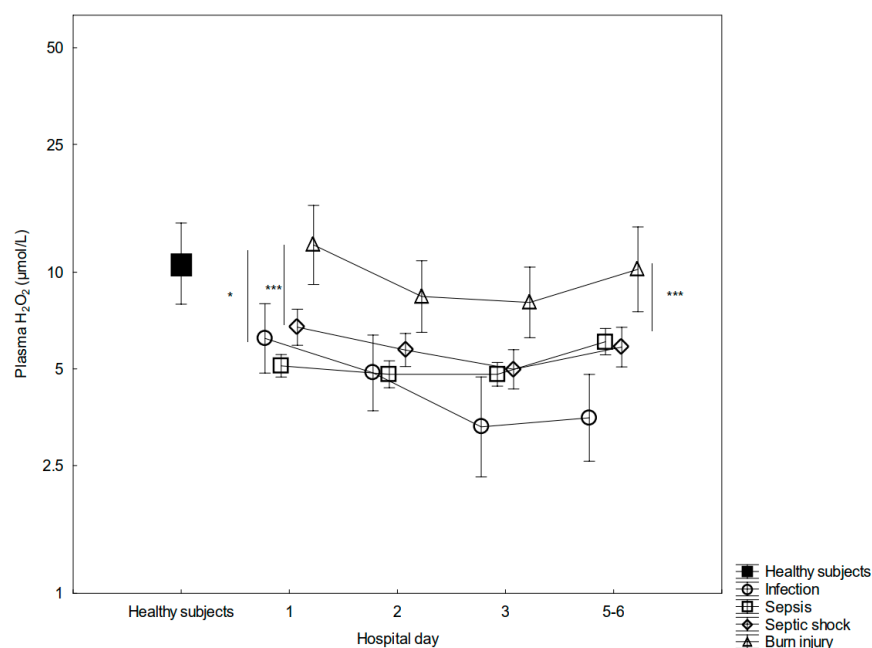

**Figure S1.** Concentrations of plasma  $\text{H}_2\text{O}_2$  from admission (Day 1) to Day 5-6 in the ICU, stratified by sepsis ( $n = 37$ ), septic shock ( $n = 23$ ), infection ( $n = 4$ ) and major burn injury ( $n = 18$ ).  $\text{H}_2\text{O}_2$  concentrations in plasma from healthy subjects ( $n = 23$ ) at one timepoint. ANOVA III for repeated measures was used to assess differences over time. Mean  $\pm$  SEM. \* $p < 0.05$ , \*\*\* $p < 0.001$ .

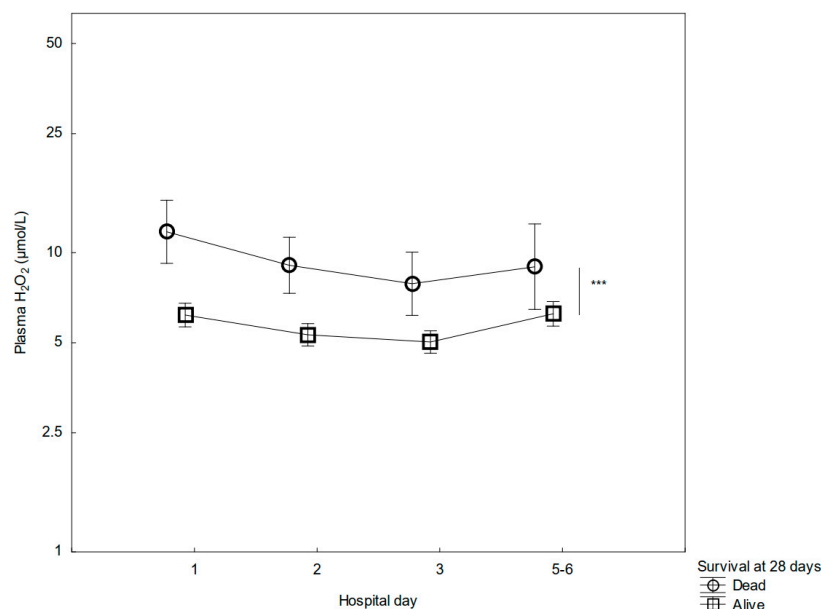

**Figure S2.** Concentrations of plasma  $\text{H}_2\text{O}_2$  from admission (Day 1) to Day 5-6 in the ICU, stratified by survivors ( $n = 71$ ) and non-survivors ( $n = 11$ ). ANOVA III for repeated

measures was used to assess differences over time. Mean  $\pm$  SEM. \*\*\* $p < 0.001$

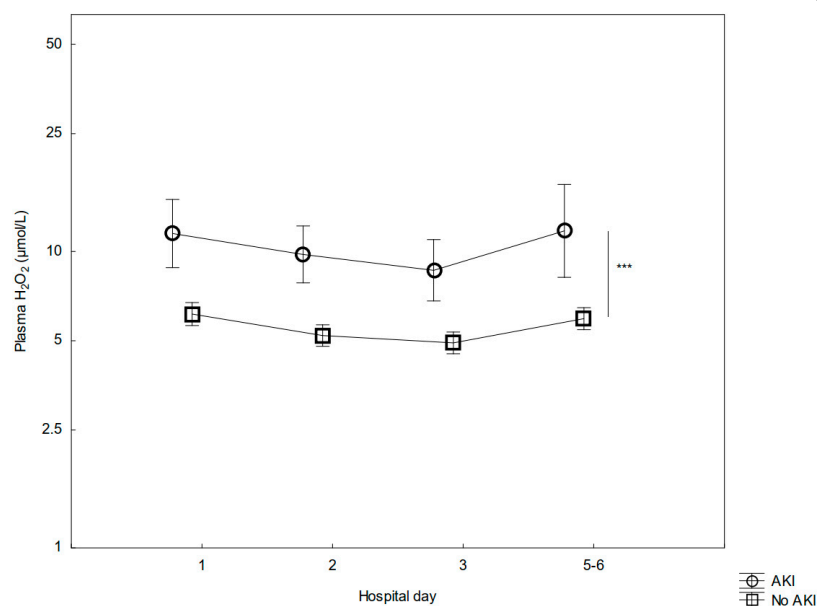

**Figure S3.** Concentrations of plasma  $H_2O_2$  from admission (Day 1) to Day 5-6 in the ICU, stratified by patients with acute kidney injury (AKI) ( $n = 12$ ) and without AKI ( $n = 70$ ). ANOVA III for repeated measures was used to assess differences over time. Mean  $\pm$  SEM. \*\*\* $p < 0.001$ .

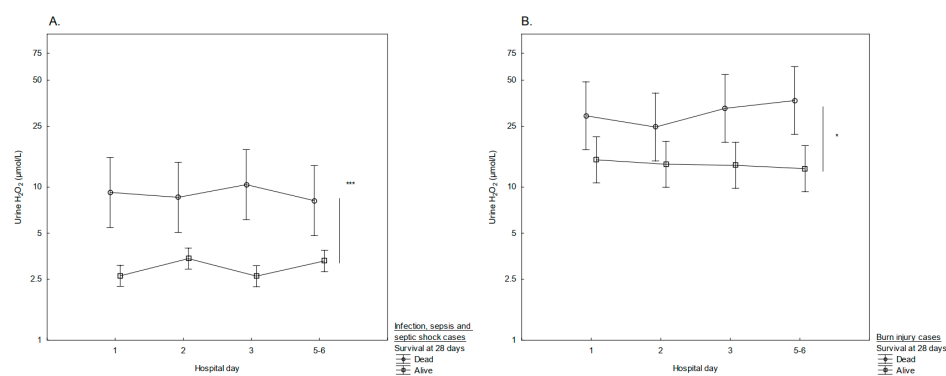

**Figure S4.** Concentrations of urine  $H_2O_2$  from admission (Day 1) to Day 5-6 in the ICU, stratified by survivors and non-survivors in (A.) patients with infection, sepsis and septic shock and in (B.) patients with major burn injuries. ANOVA III for repeated measures was used to assess differences over time. Mean  $\pm$  SEM. \* $p < 0.05$ , \*\*\* $p < 0.001$

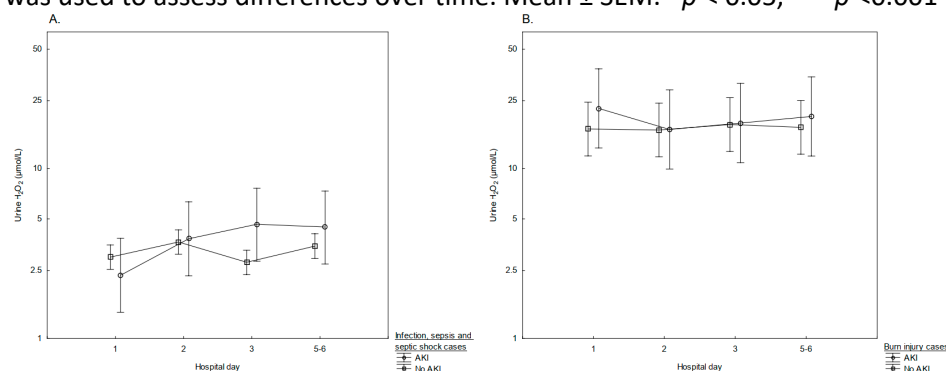

**Figure S5.** Concentrations of urine H<sub>2</sub>O<sub>2</sub> from admission (Day 1) to Day 5-6 in the ICU, stratified by patients with acute kidney injury (AKI) and without AKI in (A.) patients with infection, sepsis and septic shock and in (B.) patients with major burn injuries. ANOVA III for repeated measures was used to assess differences over time. Mean  $\pm$  SEM. \*\*\*  $p < 0.001$ .

|  | CRP  | Blood Platelets | Plasma Creatinine | IL-6  | NGAL  | Plasma Lactate | PaO <sub>2</sub> | Base Excess | WBC   |                                     |
|--|------|-----------------|-------------------|-------|-------|----------------|------------------|-------------|-------|-------------------------------------|
|  | 0.11 | 0.20            | -0.06             | 0.26  | -0.01 | 0.18           | 0.37             | 0.05        | 0.04  | Urine H <sub>2</sub> O <sub>2</sub> |
|  |      | -0.04           | 0.09              | 0.33  | 0.24  | -0.02          | 0.13             | -0.01       | -0.11 | CRP                                 |
|  |      |                 | -0.18             | -0.13 | -0.10 | 0.03           | 0.18             | 0.26        | 0.31  | Blood Platelets                     |
|  |      |                 |                   | 0.15  | 0.71  | 0.29           | 0.04             | -0.50       | 0.18  | Plasma Creatinine                   |
|  |      |                 |                   |       | 0.31  | 0.36           | 0.27             | -0.26       | 0.06  | IL-6                                |
|  |      |                 |                   |       |       | 0.45           | 0.21             | -0.52       | 0.44  | NGAL                                |
|  |      |                 |                   |       |       |                | 0.29             | -0.45       | 0.31  | Plasma Lactate                      |
|  |      |                 |                   |       |       |                |                  | -0.26       | 0.07  | PaO <sub>2</sub>                    |
|  |      |                 |                   |       |       |                |                  |             | -0.12 | Base Excess                         |

**Figure S6.** Heatmap showing associations between urine H<sub>2</sub>O<sub>2</sub> and variables of organ failure, inflammation and hypoperfusion assessed with Spearman's rank-order correlation test. Correlations coefficients are presented as rho. CRP: C-reactive protein, IL-6: Interleukin 6, NGAL: neutrophil gelatinase-associated lipocalin, PaO<sub>2</sub>: Arterial oxygen tension

**Table S1.** Clinically significant microbiological findings in blood, urine, nasopharynx or the site of infection.

|                              | Number of cultures | % of the cohort |
|------------------------------|--------------------|-----------------|
| <i>S. Aureus</i>             | 5                  | 6               |
| <i>Streptococcus species</i> | 15                 | 18              |
| <i>S. Pneumoniae</i>         | 10                 | 12              |
| <i>S. Viridans</i>           | 1                  | 1               |
| <i>S. anginosus</i>          | 1                  | 1               |
| <i>Group A Streptococcus</i> | 1                  | 1               |
| <i>Group G Streptococci</i>  | 2                  | 2               |

|                       |    |    |
|-----------------------|----|----|
| <i>E. coli</i>        | 17 | 21 |
| <i>E. coli (ESBL)</i> | 2  | 2  |
| <i>H. influenzae</i>  | 2  | 2  |
| <i>K. pneumoniae</i>  | 1  | 1  |
| <i>K. variicola</i>   | 1  | 1  |
| <i>M. catarrhalis</i> | 1  | 1  |
| <i>P. aeruginosa</i>  | 1  | 1  |
| <i>P. mirabilis</i>   | 2  | 2  |
| Negative cultures     | 35 | 43 |

Table S2. Clinical parameters. Data are presented as median (IQR) unless otherwise stated

|                                     | ALL PATIENTS (N=82) | SEPTIC SHOCK (N = 23, 28%) | SEPSIS (N = 37, 45%) | INFECTION (N = 4, 5%) | BURN INJURY (N = 18, 22%) |
|-------------------------------------|---------------------|----------------------------|----------------------|-----------------------|---------------------------|
| <b>PLASMA CRP [MG/L]</b>            |                     |                            |                      |                       |                           |
| DAY 1                               | 167 (87-253)        | 216 (152-279)              | 229 (152-314)        | 55 (48-109)           | 19 (8-93)                 |
| DAY 2                               | 235 (158-306)       | 300 (232-316)              | 239 (205-304)        | 222 (164-265)         | 100 (58-176)              |
| DAY 3                               | 193 (145-286)       | 254 (158-299)              | 194 (144-249)        | 172 (146-187)         | 175 (123-294)             |
| DAY 5-6                             | 105 (60-205)        | 96 (66-116)                | 84 (40-155)          | 93 (73-123)           | 264 (152-314)             |
| <b>PLASMA PCT [μG/L]</b>            |                     |                            |                      |                       |                           |
| DAY 1                               | 17 (2-60)           | 60 (34-98)                 | 17 (3-51)            | 2 (2-8)               | 2 (0-4)                   |
| <b>BLOOD PLT [X10<sup>12</sup>]</b> |                     |                            |                      |                       |                           |
| DAY 1                               | 166 (98-236)        | 109 (78-180)               | 159 (101-215)        | 210 (182-272)         | 250 (147-385)             |
| DAY 2                               | 130 (76-189)        | 95 (57-148)                | 143 (81-187)         | 182 (133-245)         | 123 (85-233)              |
| DAY 3                               | 120 (68-183)        | 91 (57-144)                | 141 (89-194)         | 183 (143-228)         | 106 (59-158)              |
| DAY 5-6                             | 153 (79-228)        | 112 (69-203)               | 199 (122-239)        | 192 (157-246)         | 107 (67-160)              |
| <b>PLASMA CREATININE [μMOL/L]</b>   |                     |                            |                      |                       |                           |
| DAY 1                               | 104 (76-174)        | 141 (103-187)              | 98 (74-206)          | 69 (52-85)            | 99 (75-141)               |
| DAY 2                               | 91 (71-167)         | 132 (81-185)               | 89 (67-185)          | 62 (52-73)            | 103 (74-124)              |
| DAY 3                               | 85 (69-154)         | 110 (78-197)               | 82 (65-139)          | 60 (47-76)            | 84 (66-140)               |
| DAY 5-6                             | 82 (64-153)         | 96 (74-181)                | 77 (63-140)          | 62 (47-80)            | 85 (69-157)               |
| <b>PLASMA IL-6 [ng/L]</b>           |                     |                            |                      |                       |                           |
| DAY 1                               | 234 (109-673)       | 786 (261-3658)             | 186 (97-310)         | 67 (58-359)           | 173 (120-320)             |
| DAY 2                               | 141 (85-363)        | 169 (108-409)              | 97 (51-175)          | 73 (37-161)           | 324 (161-597)             |
| DAY 3                               | 105 (48-303)        | 94 (51-401)                | 74 (22-129)          | 53 (38-74)            | 425 (172-1461)            |
| DAY 5-6                             | 63 (27-174)         | 47 (34-165)                | 35 (15-96)           | 30 (13-63)            | 259 (142-967)             |
| <b>PLASMA NGAL [μG/L]</b>           |                     |                            |                      |                       |                           |
| DAY 1                               | 433 (226-860)       | 1032 (577-1386)            | 393 (213-680)        | 220 (191-228)         | 257 (174-334)             |
| DAY 2                               | 373 (230-653)       | 720 (459-1183)             | 350 (229-488)        | 152 (103-237)         | 278 (197-376)             |
| DAY 3                               | 345 (215-569)       | 631 (352-904)              | 304 (206-466)        | 125 (83-208)          | 302 (225-499)             |
| DAY 5-6                             | 328 (215-526)       | 395 (291-669)              | 260 (206-430)        | 121 (81-192)          | 320 (197-651)             |

|                                    |                  |                   |                  |                  |                  |
|------------------------------------|------------------|-------------------|------------------|------------------|------------------|
| <b>PLASMA LACTATE [MMOL/L]</b>     |                  |                   |                  |                  |                  |
| DAY 1                              | 2.3 (1.5-3.4)    | 3.5 (2.4-5.2)     | 1.7 (1.2-2.5)    | 2.8 (2.6-2.8)    | 2.2 (1.6-3.5)    |
| DAY 2                              | 1.7 (1.3-2.2)    | 2.0 (1.5-2.9)     | 1.5 (0.9-1.8)    | 1.0 (0.8-1.3)    | 2.0 (1.8-3.6)    |
| DAY 3                              | 1.4 (1.0-2.0)    | 1.6 (1.3-2.2)     | 1.2 (0.9-1.4)    | 0.9 (0.9-1.0)    | 2.0 (1.3-4.8)    |
| DAY 5-6                            | 1.3 (0.9-1.7)    | 1.4 (1.1-1.8)     | 1.1 (0.8-1.5)    | 2.0 (1.7-2.2)    | 1.3 (1.0-1.5)    |
| <b>BLOOD PaO<sub>2</sub> [kPA]</b> |                  |                   |                  |                  |                  |
| DAY 1                              | 10.1 (7.5-12.8)  | 10.1 (9.3-12.7)   | 9.2 (7.0-11.0)   | 6.6 (4.2-10.5)   | 14.0 (10.5-23.9) |
| DAY 2                              | 9.4 (8.2-11.2)   | 9.9 (9.2-11.1)    | 8.5 (6.2-10.2)   | 9.0 (6.1-10.1)   | 10.6 (9.1-13.6)  |
| DAY 3                              | 8.9 (7.1-10.9)   | 9.2 (7.6-10.8)    | 7.8 (6.3-9.3)    | 11.4 (8.2-16.3)  | 11.0 (10.2-12.0) |
| DAY 5-6                            | 8.8 (6.4-10.7)   | 9.1 (6.9-11.2)    | 7.2 (5.7-8.8)    | 7.7 (6.3-9.1)    | 11.5 (10.1-13.0) |
| <b>BLOOD BASE EXCESS [MMOL/L]</b>  |                  |                   |                  |                  |                  |
| DAY 1                              | -1.8 (-4.8-1.05) | -5.0 (-7.2- -1.4) | -0.8 (-3.4-2.5)  | 1.4 (0.0-2.7)    | -2.2 (-6.0-1.0)  |
| DAY 2                              | -0.5 (-2.5-2.5)  | -1.9 (-3.5- -0.4) | 0.6 (-2.0-2.6)   | 0.5 (0.5-1.5)    | 1.0 (-2.5-2.6)   |
| DAY 3                              | 1 (-2.175-3.775) | -0.2 (-3.8-2.7)   | 1.2 (-1.7-4.1)   | 0.3 (-0.5-0.8)   | 3.0 (0.6-4.8)    |
| DAY 5-6                            | 3.1 (0.8-6.2)    | 2.0 (0.5-5.6)     | 3.8 (1.3-6.1)    | 1.2 (0.4-1.9)    | 5.7 (4.0-6.6)    |
| <b>WBC X10<sup>9</sup>/L</b>       |                  |                   |                  |                  |                  |
| DAY 1                              | 15.8 (11.0-21.5) | 16.2 (6.0-21.5)   | 16.2 (11.1-20.6) | 17.1 (11.2-20.6) | 13.8 (12.4-29.8) |
| DAY 2                              | 13.3 (8.5-19.3)  | 18.6 (13.5-24.3)  | 11.6 (8.4-17.0)  | 10.5 (5.2-15.2)  | 11.8 (6.7-13.5)  |
| DAY 3                              | 10.6 (6.0-18.0)  | 18.3 (12.2-22.0)  | 9.6 (7.0-14.3)   | 7.7 (6.0-9.0)    | 5.6 (4.4-11.1)   |
| DAY 5-6                            | 9.8 (6.0-14.3)   | 13.9 (9.9-17.3)   | 9.0 (6.3-12.7)   | 8.5 (7.2-9.3)    | 6.7 (4.9-12.2)   |

CRP; C-reactive protein, PCT; pro-calcitonin, PLT; platelets, IL; interleukin; NGAL; neutrophil gelatinase associated lipocalin, PaO<sub>2</sub>; partial pressure of oxygen, WBC; white blood cell count.
